# Supplementary material for: Polyaniline decorated Bi2MoO6 nanosheets with effective interfacial charge transfer as photocatalysts and optical limiters
Source: Royal Society of Chemistry journal article supplement (doi:10.1039/c7cp06320b), 2017-01-01
Supplement: c7cp06320b1.pdf [file c7cp06320b1.pdf]

## ***Supporting Information***

### **Polyaniline decorated Bi<sub>2</sub>MoO<sub>6</sub> nanosheets with effective interfacial charge transfer as photocatalysts and optical limiters**

Wei Zhao<sup>a,\*</sup>, Cheng Li<sup>b</sup>, Aijian Wang<sup>b,\*</sup>, Cuncai Lv<sup>b</sup>, Weihua Zhu<sup>b</sup>, Shengping Dou<sup>a</sup>, Qian Wang<sup>a</sup>,

Qin Zhong<sup>c</sup>

<sup>a</sup> School of Energy & Power Engineering, Jiangsu University, Zhenjiang 212013, P.R. China

<sup>b</sup> School of Chemistry & Chemical Engineering, Jiangsu University, Zhenjiang 212013, P.R. China

<sup>c</sup> School of Chemical Engineering, Nanjing University of Science and Technology, Nanjing 210094, P. R. China

Corresponding Author. Tel/Fax: +86-511-88797815, E-mail: [wzhao@ujs.edu.cn](mailto:wzhao@ujs.edu.cn),  
[wajujs@ujs.edu.cn](mailto:wajujs@ujs.edu.cn)

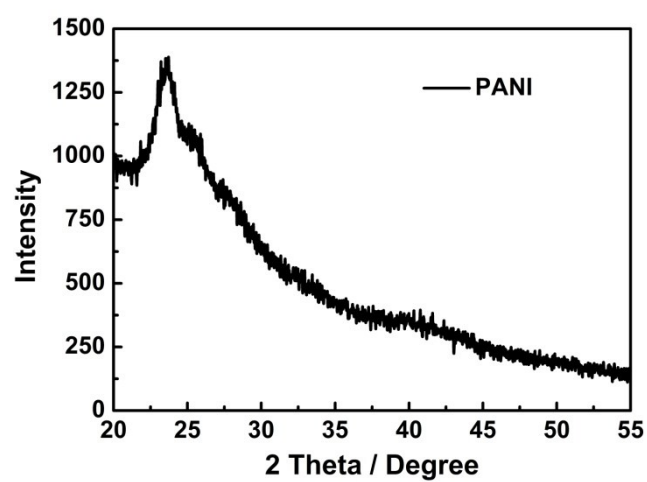

Figure S1. XRD pattern of PANI.

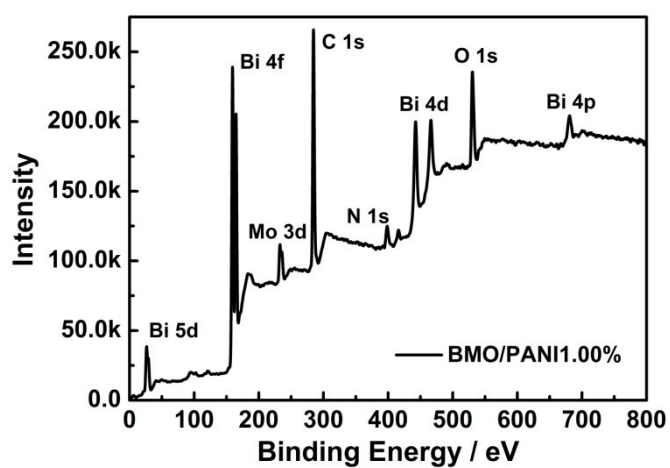

Figure S2. XPS survey scan spectrum of BMO/PANI1.00%.

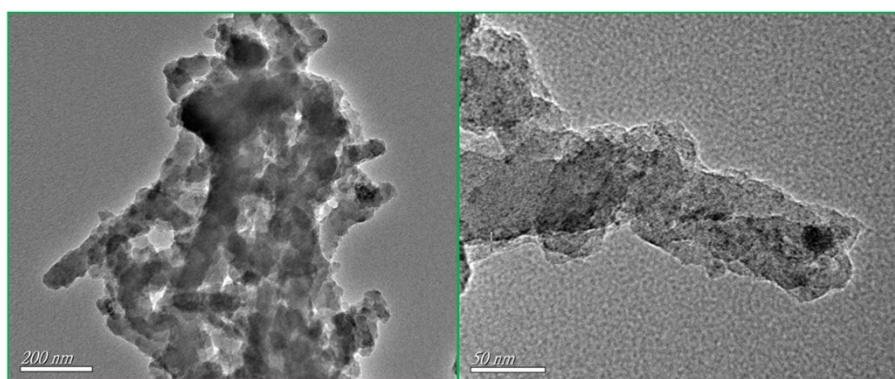

Figure S3. TEM images of PANI.

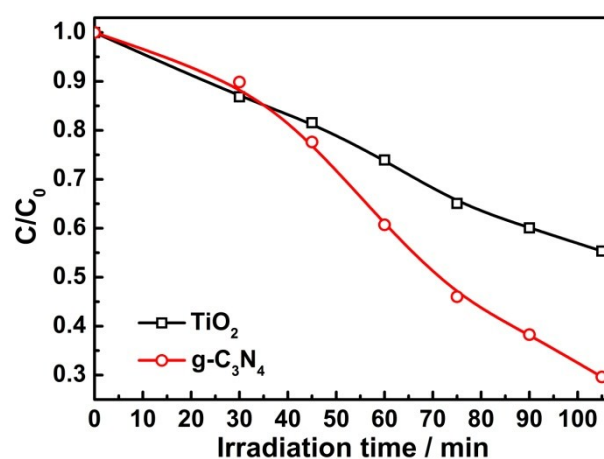

Figure S4. Photocatalytic performances of TiO<sub>2</sub> and g-C<sub>3</sub>N<sub>4</sub> for the photocatalytic decolorization of RhB aqueous solutions.

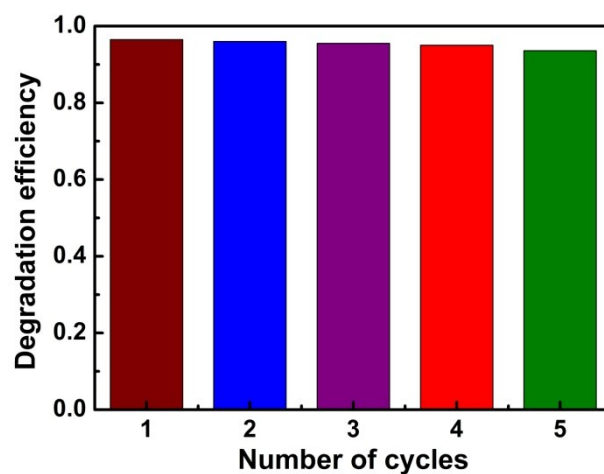

Figure S5. Cycling experiments on the photocatalytic degradation of RhB in the presence of BMO/PANI1.00%.

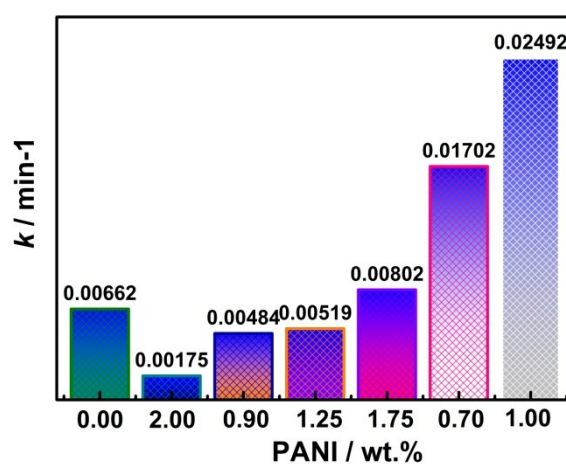

Figure S6. The kinetic constants of the as-prepared samples for the degradation of RhB.

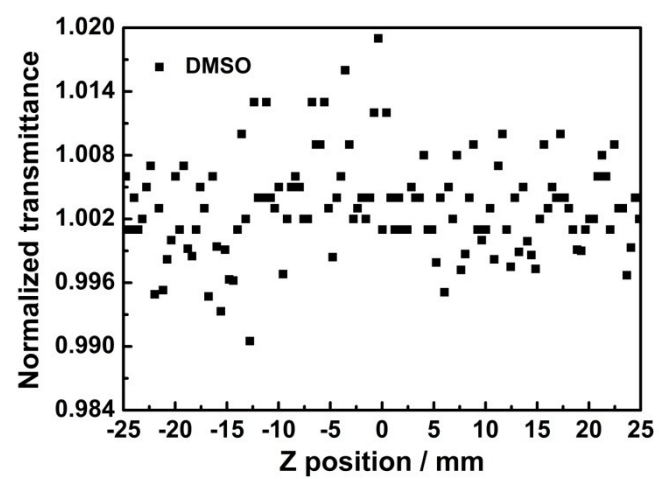

Figure S7. Open aperture Z-scan curve of the solvent DMSO.
